# Supplementary material for: Ascending flight and decelerating vertical glides in Anna's hummingbirds
Source: Oxford University Press journal article supplement (doi:10.1242/jeb.191171), 2018-01-01
Supplement: jeb191171supp.pdf [file jeb191171supp.pdf]

Dataset 1. Morphometric information and digitization in 2D of hummingbirds ( $N=4$ ) during ascending flight. Scale 395.22 pixels/m. Tail tip (Pt1), right-wing tip in mirror (Pt2), right-wing base in mirror (Pt3), beak base (Pt4), left-wing base in mirror(Pt5) and tail base (Pt6)

[Click here to Download Dataset 1](#)

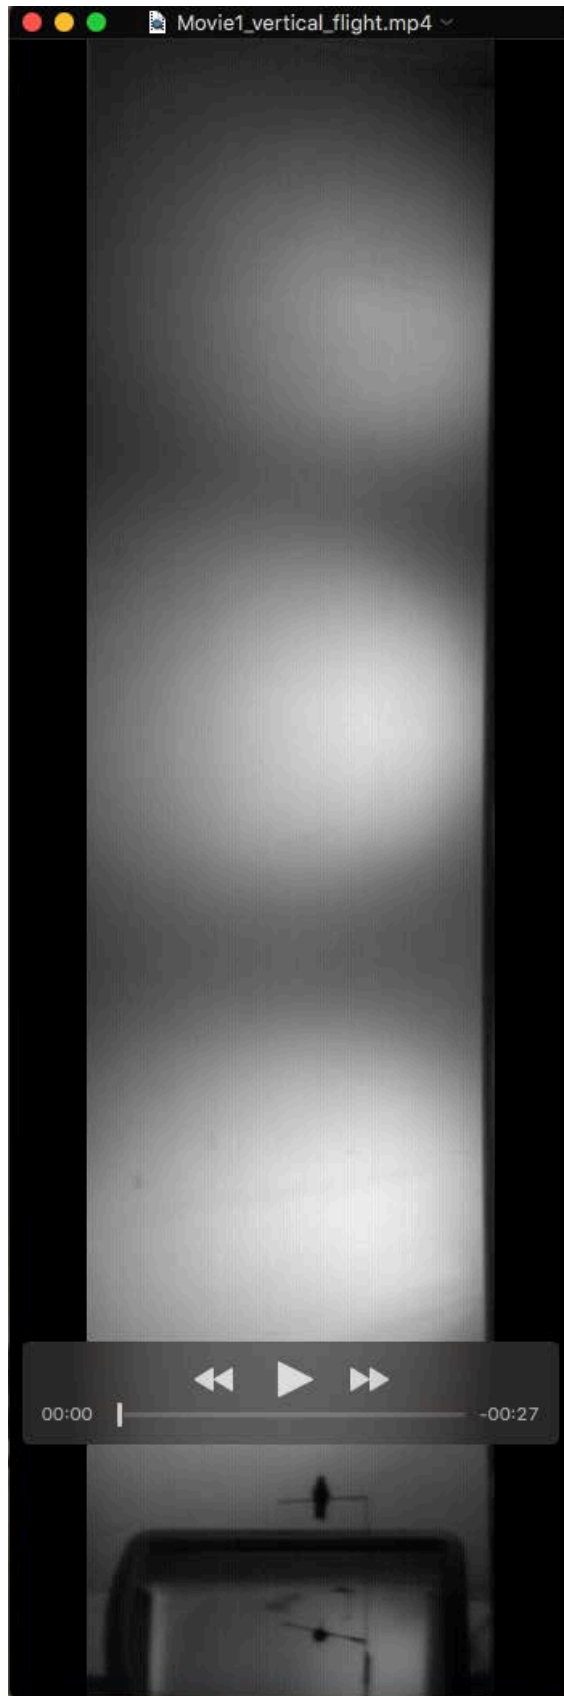

**Movie 1.** Anna's hummingbird in vertical ascent.

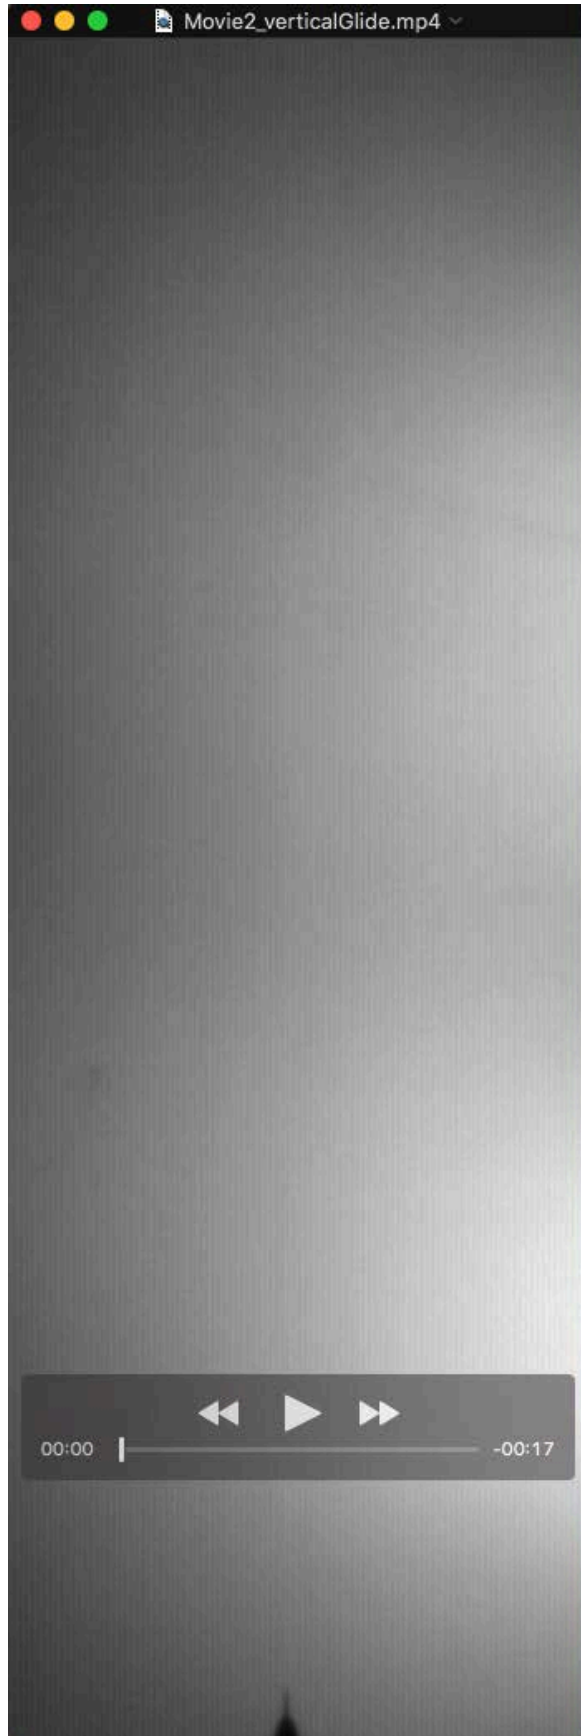

**Movie 2.** Ascending Anna's hummingbird adopting a ballistic posture with folded wings upon cessation of flapping.

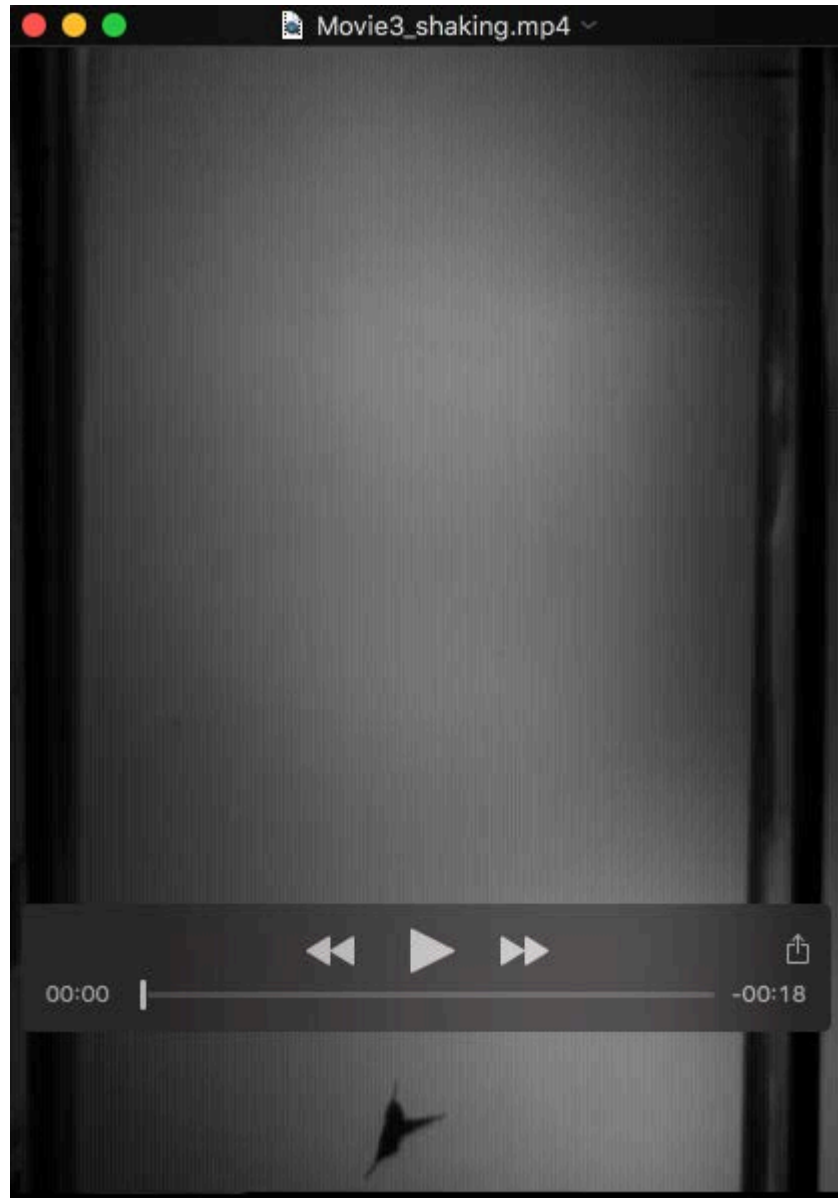

**Movie 3.** Anna's hummingbird shaking its body and changing wing phase relationships while in vertical ascent.
